# Supplementary material for: Comparison of the Combined Obesity Indices to Predict Cardiovascular Diseases Risk Factors and Metabolic Syndrome in Northeast China
Source: PubMed Central journal article supplement (PMC4997487; doi:10.3390/ijerph13080801), 2016-08-09

# Supplementary Material: Comparison of the Combined Obesity Indices to Predict Cardiovascular Diseases Risk Factors and Metabolic Syndrome in Northeast China

Yuchun Tao, Jianxing Yu, Yuhui Tao, Hui Pang, Yang Yu, Yaqin Yu and Lina Jin

## 1. Sampling Method

Five-stage stratified random cluster sampling was used to select the samples under study. In the first stage, 32 districts/counties were identified in proportion to population, geographic location and ethnicity, from nine cities (Changchun, Jilin, Siping, Liaoyuan, Tonghua, Baishan, Songyuan, Baicheng and Yanbian). At the second stage, three or four towns (depending on the size of the district) were selected by stratified random sampling to guarantee the representativeness of each sample. In the third stage, three neighborhood committees were chosen by stratified random sampling from each of the towns previously selected. In the fourth stage, one village from each chosen neighborhood committee was selected by simple random sampling. In the final stage, cluster random sampling was used to identify individuals aged 18 to 79 years old from each of the villages selected for the study.

## 2. Data Measurement

Anthropometric measurements including height, weight, waist circumference (WC), hip circumference (HC), blood pressure, serum lipids and fasting blood sugar were taken. During the interview, weight, height, WC and HC were determined through standardized protocol and measured in light indoor light clothing without shoes. WC was measured midway between the inferior margin of the last rib and the crest of the ileum in a horizontal plan. HC was measured at the maximal protrusion of the buttocks. Weight was measured to the nearest 0.1 kg, and height, WC and HC were measured to the nearest 0.1 cm.

A mercury sphygmomanometer was used to measure the blood pressure in the sitting position after a 10-min rest period. The appearance of the first sound was used to define systolic blood pressure (SBP) and the disappearance of sound was used to define diastolic blood pressure (DBP). Two readings each of SBP and DBP were recorded, and the average of each measurement was used for data analysis. If the first two measurements differed by more than 5 mmHg, additional readings were taken.

Blood samples were obtained from the antecubital vein into anticoagulant tubes containing EDTA in the morning after an overnight fasting period. All of the collected samples were transported on dry ice at prearranged intervals to the central laboratory. Serum lipids including TC, TG, HDL-C and LDL-C, which were measured by a MODULE P800 biochemical analyses machine.

Fasting plasma glucose (FPG) levels were measured using the Bayer Bai Ankang fingertip blood glucose monitor machine by taking a small drop of blood from a finger onto a strip of paper in the morning after participants fasted for 10 or more hours overnight.

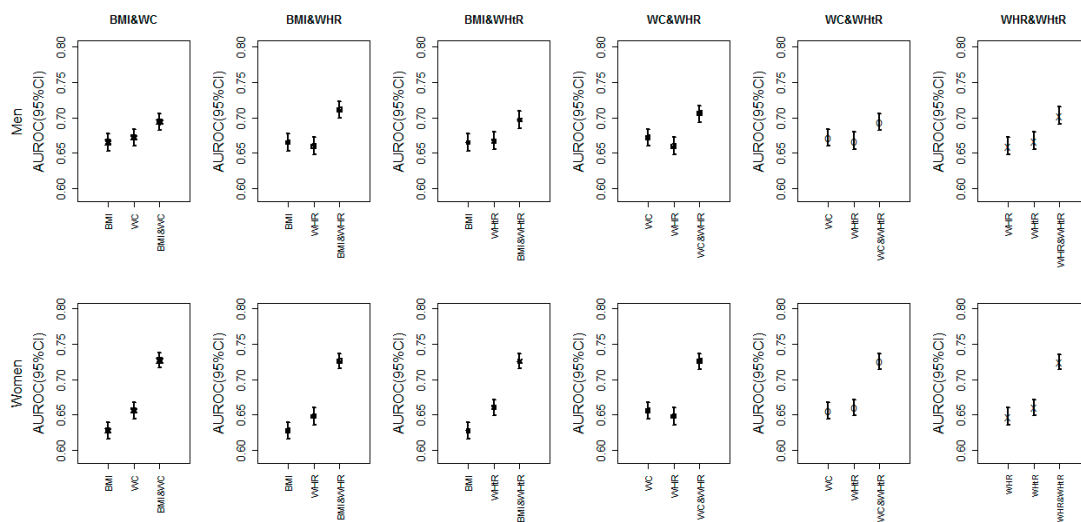

Figure S1. The adjusted AUROC of a single index and various combinations of two indices for dyslipidemia.

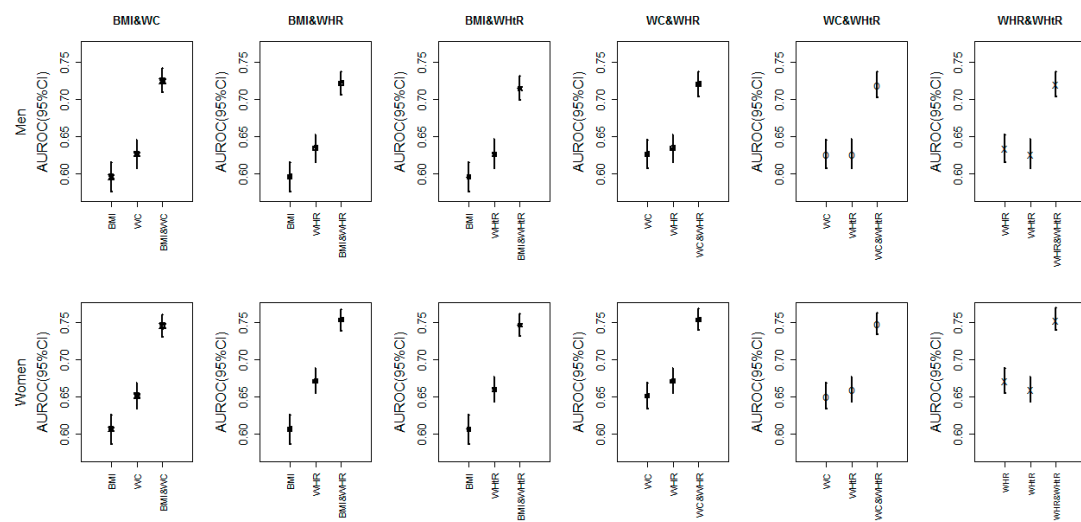

Figure S2. The adjusted AUROC of a single index and various combinations of two indices for diabetes.

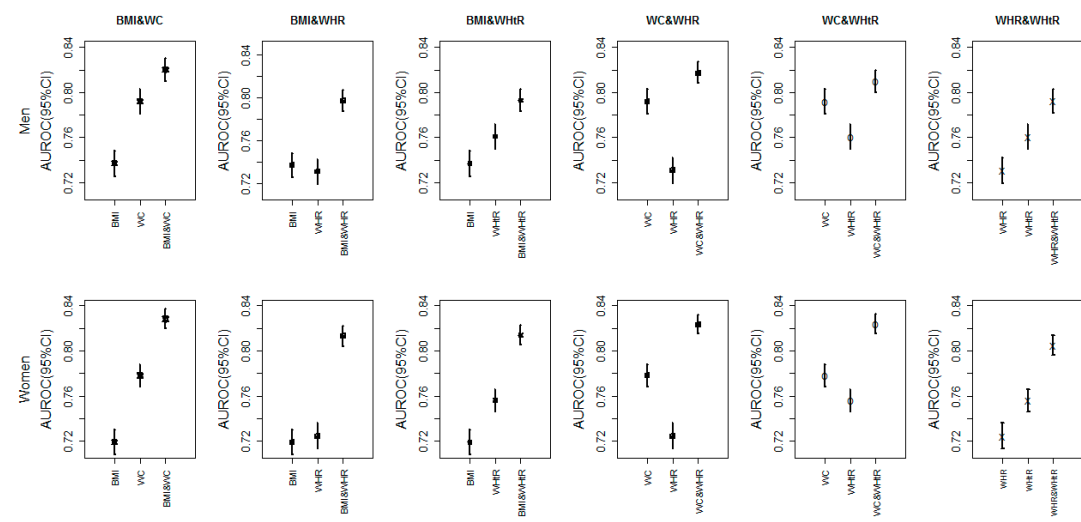

Figure S3. The adjusted AUROC of a single index and various combinations of two indices for MetS.

**Table S1.** The clustering effects of the obesity indices on CVD risk factors and MetS.

| Risk Factors  | The Adjusted ORs for Various Obesity Indices Clusters |                     |                     |
|---------------|-------------------------------------------------------|---------------------|---------------------|
|               | ≥1                                                    | ≥2                  | ≥3                  |
| <b>Male</b>   |                                                       |                     |                     |
| Hypertension  | 2.95 (2.64,3.30)                                      | 3.35 (2.99,3.76)    | 3.53 (3.13,3.97)    |
| Dyslipidemia  | 5.10 (4.56,5.71)                                      | 6.19 (5.50,6.96)    | 6.78 (6.01,7.65)    |
| Diabetes      | 3.07 (2.49,3.77)                                      | 3.40 (2.76,4.20)    | 3.66 (2.96,4.52)    |
| MetS          | 21.14 (17.31,25.82)                                   | 29.58 (24.16,36.23) | 34.57 (28.18,42.40) |
| <b>Female</b> |                                                       |                     |                     |
| Hypertension  | 2.90 (2.57,3.28)                                      | 3.27 (2.89,3.70)    | 3.58 (3.16,4.07)    |
| Dyslipidemia  | 3.12 (2.79,3.50)                                      | 3.46 (3.08,3.89)    | 3.72 (3.30,4.19)    |
| Diabetes      | 2.96 (2.36,3.72)                                      | 3.36 (2.67,4.22)    | 3.62 (2.87,4.56)    |
| MetS          | 15.20 (12.60,18.34)                                   | 20.15 (16.67,24.37) | 23.54 (19.43,28.51) |

ORs were adjusted for age.

**Table S2.** AUROC of the various obesity indices for CVD risk factors and MetS.

| Risk Factors  | BMI                 | WC                         | WHR                        | WHtR                       |
|---------------|---------------------|----------------------------|----------------------------|----------------------------|
|               | AUROC(95% CI)       | AUROC(95% CI)              | AUROC(95% CI)              | AUROC(95% CI)              |
| <b>Male</b>   |                     |                            |                            |                            |
| Hypertension  | 0.606 (0.593,0.619) | 0.621 (0.608,0.634)        | 0.629 (0.617,0.642)        | <b>0.634 (0.622,0.647)</b> |
| Dyslipidemia  | 0.665 (0.653,0.677) | <b>0.672 (0.660,0.684)</b> | 0.660 (0.648,0.672)        | 0.667 (0.655,0.680)        |
| Diabetes      | 0.595 (0.575,0.615) | 0.626 (0.606,0.645)        | <b>0.634 (0.615,0.652)</b> | 0.626 (0.607,0.646)        |
| MetS          | 0.737 (0.725,0.748) | <b>0.792 (0.781,0.803)</b> | 0.731 (0.719,0.742)        | 0.761 (0.750,0.772)        |
| <b>Female</b> |                     |                            |                            |                            |
| Hypertension  | 0.635 (0.623,0.647) | 0.674 (0.662,0.686)        | 0.658 (0.646,0.669)        | <b>0.677 (0.666,0.689)</b> |
| Dyslipidemia  | 0.628 (0.616,0.640) | 0.656 (0.644,0.668)        | 0.648 (0.636,0.660)        | <b>0.661 (0.649,0.672)</b> |
| Diabetes      | 0.606 (0.586,0.625) | 0.651 (0.633,0.669)        | <b>0.671 (0.654,0.689)</b> | 0.660 (0.643,0.677)        |
| MetS          | 0.719 (0.708,0.730) | <b>0.778 (0.768,0.788)</b> | 0.724 (0.713,0.736)        | 0.756 (0.746,0.766)        |

AUROC were adjusted for age.

**Table S3.** AUROC of the clustering of the various obesity indices for CVD risk factors and MetS.

| Risk Factors  | BMI&WC                     | BMI&WHR                    | BMI&WHtR            | WC&WHR                     | WC&WHtR             | WHR&WHtR                   |
|---------------|----------------------------|----------------------------|---------------------|----------------------------|---------------------|----------------------------|
|               | AUROC(95% CI)              | AUROC(95% CI)              | AUROC(95% CI)       | AUROC(95% CI)              | AUROC(95% CI)       | AUROC(95% CI)              |
| <b>Male</b>   |                            |                            |                     |                            |                     |                            |
| Hypertension  | <b>0.730 (0.718,0.740)</b> | <b>0.730 (0.718,0.741)</b> | 0.729 (0.718,0.740) | 0.728 (0.717,0.739)        | 0.728 (0.717,0.740) | 0.728 (0.717,0.739)        |
| Dyslipidemia  | 0.694 (0.682,0.706)        | <b>0.711 (0.700,0.723)</b> | 0.697 (0.685,0.709) | 0.706 (0.694,0.717)        | 0.694 (0.682,0.706) | 0.703 (0.691,0.715)        |
| Diabetes      | <b>0.725 (0.709,0.742)</b> | 0.722 (0.706,0.738)        | 0.715 (0.699,0.732) | 0.721 (0.704,0.737)        | 0.720 (0.703,0.737) | 0.721 (0.704,0.737)        |
| MetS          | <b>0.820 (0.810,0.830)</b> | 0.797 (0.787,0.807)        | 0.793 (0.783,0.803) | 0.817 (0.808,0.827)        | 0.810 (0.800,0.820) | 0.793 (0.782,0.803)        |
| <b>Female</b> |                            |                            |                     |                            |                     |                            |
| Hypertension  | <b>0.790 (0.780,0.799)</b> | 0.786 (0.776,0.795)        | 0.787 (0.778,0.797) | 0.787 (0.777,0.796)        | 0.787 (0.778,0.797) | 0.783 (0.774,0.793)        |
| Dyslipidemia  | <b>0.727 (0.717,0.738)</b> | 0.726 (0.716,0.737)        | 0.726 (0.716,0.737) | 0.726 (0.715,0.736)        | 0.726 (0.715,0.736) | 0.725 (0.714,0.735)        |
| Diabetes      | 0.746 (0.731,0.761)        | <b>0.754 (0.739,0.768)</b> | 0.747 (0.732,0.762) | <b>0.754 (0.740,0.769)</b> | 0.749 (0.734,0.764) | <b>0.754 (0.740,0.770)</b> |
| MetS          | <b>0.828 (0.820,0.837)</b> | 0.813 (0.804,0.822)        | 0.814 (0.805,0.823) | 0.823 (0.815,0.832)        | 0.824 (0.815,0.833) | 0.805 (0.796,0.814)        |

AUROC were adjusted for age.

**Table S4.** AUROC of the two obesity indices combinations to predict CVD risk factors and MetS in different age groups.

| Risk Factors        | AUROC (95% CI) in Males |                     |                     | AUROC (95% CI) in Females |                     |                     |
|---------------------|-------------------------|---------------------|---------------------|---------------------------|---------------------|---------------------|
|                     | 18–44                   | 45–64               | 65–79               | 18–44                     | 45–64               | 65–79               |
| <b>Hypertension</b> |                         |                     |                     |                           |                     |                     |
| BMI&WC              | 0.668 (0.647,0.689)     | 0.621 (0.603,0.639) | 0.612 (0.571,0.652) | 0.705 (0.678,0.732)       | 0.636 (0.620,0.652) | 0.597 (0.557,0.636) |
| BMI&WHR             | 0.676 (0.655,0.697)     | 0.623 (0.605,0.642) | 0.628 (0.588,0.669) | 0.690 (0.663,0.717)       | 0.633 (0.617,0.649) | 0.575 (0.536,0.614) |
| BMI&WHtR            | 0.667 (0.645,0.688)     | 0.622 (0.604,0.640) | 0.628 (0.588,0.669) | 0.700 (0.673,0.727)       | 0.633 (0.617,0.649) | 0.587 (0.548,0.627) |
| WC&WHR              | 0.671 (0.65,0.692)      | 0.623 (0.605,0.641) | 0.614 (0.573,0.654) | 0.682 (0.654,0.711)       | 0.635 (0.619,0.651) | 0.589 (0.550,0.629) |
| WC&WHtR             | 0.662 (0.641,0.684)     | 0.621 (0.603,0.639) | 0.615 (0.574,0.655) | 0.685 (0.657,0.714)       | 0.632 (0.616,0.648) | 0.595 (0.556,0.634) |
| WHR&WHtR            | 0.668 (0.647,0.690)     | 0.624 (0.606,0.643) | 0.624 (0.584,0.665) | 0.679 (0.651,0.708)       | 0.629 (0.613,0.645) | 0.558 (0.518,0.598) |
| <b>Dyslipidemia</b> |                         |                     |                     |                           |                     |                     |
| BMI&WC              | 0.718 (0.700,0.736)     | 0.683 (0.666,0.700) | 0.645 (0.606,0.685) | 0.659 (0.635,0.682)       | 0.635 (0.619,0.650) | 0.588 (0.551,0.625) |
| BMI&WHR             | 0.730 (0.712,0.748)     | 0.687 (0.670,0.704) | 0.650 (0.611,0.690) | 0.665 (0.642,0.688)       | 0.638 (0.622,0.653) | 0.587 (0.551,0.624) |
| BMI&WHtR            | 0.715 (0.697,0.734)     | 0.675 (0.658,0.693) | 0.648 (0.609,0.687) | 0.659 (0.636,0.683)       | 0.633 (0.617,0.649) | 0.585 (0.548,0.622) |
| WC&WHR              | 0.721 (0.703,0.739)     | 0.685 (0.668,0.702) | 0.648 (0.610,0.687) | 0.642 (0.618,0.667)       | 0.639 (0.623,0.655) | 0.592 (0.555,0.628) |
| WC&WHtR             | 0.707 (0.688,0.725)     | 0.673 (0.656,0.691) | 0.643 (0.604,0.683) | 0.638 (0.613,0.662)       | 0.634 (0.619,0.650) | 0.589 (0.552,0.626) |
| WHR&WHtR            | 0.716 (0.697,0.734)     | 0.677 (0.660,0.695) | 0.643 (0.604,0.681) | 0.646 (0.622,0.670)       | 0.637 (0.621,0.653) | 0.579 (0.542,0.616) |
| <b>Diabetes</b>     |                         |                     |                     |                           |                     |                     |
| BMI&WC              | 0.659 (0.615,0.704)     | 0.618 (0.594,0.643) | 0.620 (0.567,0.673) | 0.680 (0.620,0.740)       | 0.604 (0.581,0.627) | 0.575 (0.532,0.618) |

|             |                     |                     |                     |                     |                     |                     |
|-------------|---------------------|---------------------|---------------------|---------------------|---------------------|---------------------|
| BMI&WHR     | 0.675 (0.632,0.718) | 0.626 (0.603,0.650) | 0.608 (0.556,0.660) | 0.702 (0.640,0.763) | 0.634 (0.612,0.656) | 0.568 (0.524,0.612) |
| BMI&WHtR    | 0.659 (0.615,0.704) | 0.612 (0.588,0.636) | 0.601 (0.549,0.654) | 0.678 (0.617,0.739) | 0.603 (0.581,0.626) | 0.585 (0.542,0.627) |
| WC&WHR      | 0.674 (0.630,0.718) | 0.634 (0.610,0.658) | 0.609 (0.558,0.661) | 0.693 (0.631,0.755) | 0.638 (0.615,0.660) | 0.559 (0.516,0.603) |
| WC&WHtR     | 0.663 (0.619,0.707) | 0.621 (0.597,0.646) | 0.603 (0.550,0.655) | 0.675 (0.615,0.736) | 0.614 (0.591,0.636) | 0.571 (0.528,0.613) |
| WHR&WHtR    | 0.673 (0.628,0.717) | 0.630 (0.606,0.654) | 0.587 (0.536,0.639) | 0.697 (0.636,0.757) | 0.637 (0.615,0.659) | 0.559 (0.516,0.602) |
| <b>MetS</b> |                     |                     |                     |                     |                     |                     |
| BMI&WC      | 0.832 (0.818,0.847) | 0.799 (0.784,0.813) | 0.778 (0.743,0.813) | 0.842 (0.824,0.859) | 0.760 (0.746,0.774) | 0.711 (0.678,0.744) |
| BMI&WHR     | 0.823 (0.808,0.838) | 0.770 (0.754,0.785) | 0.764 (0.729,0.799) | 0.810 (0.791,0.828) | 0.745 (0.731,0.759) | 0.696 (0.663,0.730) |
| BMI&WHtR    | 0.813 (0.797,0.829) | 0.769 (0.754,0.785) | 0.763 (0.728,0.798) | 0.824 (0.806,0.843) | 0.740 (0.725,0.754) | 0.695 (0.662,0.729) |
| WC&WHR      | 0.837 (0.822,0.852) | 0.801 (0.787,0.816) | 0.776 (0.743,0.809) | 0.820 (0.80,0.840)  | 0.760 (0.747,0.774) | 0.700 (0.666,0.733) |
| WC&WHtR     | 0.821 (0.805,0.836) | 0.791 (0.776,0.806) | 0.768 (0.733,0.803) | 0.821 (0.801,0.840) | 0.751 (0.737,0.765) | 0.694 (0.660,0.728) |
| WHR&WHtR    | 0.814 (0.798,0.830) | 0.772 (0.757,0.787) | 0.744 (0.710,0.779) | 0.807 (0.787,0.828) | 0.739 (0.724,0.753) | 0.654 (0.619,0.689) |

**Table S5.** The adjusted ORs of the combined obesity indices for CVD risk factors and MetS.

| Risk Factors  | Adjusted ORs (95% CI) for BMI&WC  |                                   |                                   |                                   | Adjusted ORs (95% CI) for BMI&WHR  |                                    |                                    |                                    |
|---------------|-----------------------------------|-----------------------------------|-----------------------------------|-----------------------------------|------------------------------------|------------------------------------|------------------------------------|------------------------------------|
|               | BMI <sub>0</sub> &WC <sub>0</sub> | BMI <sub>0</sub> &WC <sub>1</sub> | BMI <sub>1</sub> &WC <sub>0</sub> | BMI <sub>1</sub> &WC <sub>1</sub> | BMI <sub>0</sub> &WHR <sub>0</sub> | BMI <sub>0</sub> &WHR <sub>1</sub> | BMI <sub>1</sub> &WHR <sub>0</sub> | BMI <sub>1</sub> &WHR <sub>1</sub> |
| <b>Male</b>   |                                   |                                   |                                   |                                   |                                    |                                    |                                    |                                    |
| Hypertension  | 1                                 | 2.04 (1.65,2.52)                  | 1.87 (1.57,2.22)                  | 3.20 (2.87,3.57)                  | 1                                  | 1.86 (1.59,2.18)                   | 2.14 (1.81,2.55)                   | 3.55 (3.16,4.00)                   |
| Dyslipidemia  | 1                                 | 2.86 (2.34,3.51)                  | 2.33 (1.98,2.75)                  | 5.49 (4.93,6.11)                  | 1                                  | 2.89 (2.47,3.38)                   | 2.97 (2.52,3.49)                   | 6.86 (6.09,7.74)                   |
| Diabetes      | 1                                 | 2.47 (1.83,3.33)                  | 1.52 (1.12,2.06)                  | 3.10 (2.59,3.70)                  | 1                                  | 2.38 (1.84,3.10)                   | 1.87 (1.36,2.57)                   | 3.73 (3.03,4.61)                   |
| MetS          | 1                                 | 11.89 (9.45,14.96)                | 2.95 (2.35,3.70)                  | 22.93 (19.70,26.70)               | 1                                  | 6.68 (5.38,8.29)                   | 7.53 (6.04,9.38)                   | 27.51 (22.92,33.02)                |
| <b>Female</b> |                                   |                                   |                                   |                                   |                                    |                                    |                                    |                                    |
| Hypertension  | 1                                 | 2.22 (1.85,2.65)                  | 1.83 (1.51,2.21)                  | 3.48 (3.11,3.91))                 | 1                                  | 1.62 (1.38,1.91)                   | 2.36 (2.01,2.76)                   | 3.43 (3.02,3.88)                   |
| Dyslipidemia  | 1                                 | 2.49 (2.11,2.95)                  | 2.03 (1.71,2.41)                  | 3.28 (2.95,3.65)                  | 1                                  | 2.05 (1.76,2.39)                   | 2.25 (1.94,2.60)                   | 3.61 (3.21,4.06)                   |
| Diabetes      | 1                                 | 2.12 (1.62,2.76)                  | 1.22 (0.85,1.73)                  | 2.73 (2.26,3.28)                  | 1                                  | 2.52 (1.94,3.27)                   | 1.42 (1.04,1.95)                   | 3.64 (2.93,4.52)                   |
| MetS          | 1                                 | 9.56 (7.85,11.64)                 | 3.34 (2.67,4.17)                  | 17.40 (15.00,20.18)               | 1                                  | 5.15 (4.26,6.24)                   | 6.72 (5.58,8.10)                   | 17.29 (14.71,20.33)                |

All abbreviations of each category are in Table 1. ORs were adjusted for age.

**Table S6.** The adjusted ORs for the combined obesity indices with CVD risk factors and MetS.

| Risk Factors   | Adjusted ORs (95% CI) of WC&WHR |                  |                     |                     | Adjusted ORs (95% CI) for BMI&WHtR |                  |                  |                     |
|----------------|---------------------------------|------------------|---------------------|---------------------|------------------------------------|------------------|------------------|---------------------|
|                | WC0&WHR0                        | WC0&WHR1         | WC1&WHR0            | WC1&WHR1            | BMI0&WHtR0                         | BMI0&WHtR1       | BMI1&WHtR0       | BMI1&WHtR1          |
| <b>Males</b>   |                                 |                  |                     |                     |                                    |                  |                  |                     |
| Hypertension   | 1                               | 1.68 (1.43,1.97) | 2.20 (1.78,2.73)    | 3.19 (2.85,3.57)    | 1                                  | 2.24 (1.84,2.74) | 1.98 (1.64,2.39) | 3.19 (2.86,3.56)    |
| Dyslipidemia   | 1                               | 2.58 (2.20,3.01) | 3.42 (2.80,4.19)    | 5.91 (5.28,6.61)    | 1                                  | 2.68 (2.21,3.26) | 2.43,2.04,2.90)  | 5.31 (4.77,5.91)    |
| Diabetes       | 1                               | 1.80 (1.37,2.36) | 1.85 (1.26,2.72)    | 3.55 (2.92,4.30)    | 1                                  | 2.13 (1.60,2.85) | 1.67 (1.19,2.34) | 2.95 (2.46,3.54)    |
| MetS           | 1                               | 3.51 (2.82,4.38) | 14.74 (11.66,18.64) | 26.48 (22.46,31.23) | 1                                  | 7.28 (5.82,9.10) | 4.11 (3.30,5.13) | 17.95 (15.50,20.79) |
| <b>Females</b> |                                 |                  |                     |                     |                                    |                  |                  |                     |
| Hypertension   | 1                               | 1.24 (1.02,1.50) | 2.67 (2.24,3.19)    | 3.09 (2.75,3.48)    | 1                                  | 1.88 (1.59,2.22) | 1.74 (1.38,2.19) | 3.43 (3.05,3.86)    |
| Dyslipidemia   | 1                               | 1.60 (1.34,1.91) | 2.31 (1.95,2.72)    | 3.24 (2.90,3.61)    | 1                                  | 2.31 (1.98,2.71) | 2.01 (1.64,2.46) | 3.39 (3.03,3.79)    |
| Diabetes       | 1                               | 2.26 (1.67,3.04) | 1.69 (1.21,2.37)    | 3.62 (2.94,4.45)    | 1                                  | 2.33 (1.79,3.02) | 0.83 (0.48,1.43) | 3.08 (2.51,3.78)    |
| MetS           | 1                               | 2.78 (2.21,3.48) | 11.58 (9.56,14.03)  | 16.57 (14.25,19.28) | 1                                  | 6.84 (5.62,8.32) | 3.80 (2.93,4.94) | 16.70 (14.26,19.57) |

ORs were adjusted for age.

**Table S7.** The adjusted ORs for the combined obesity indices with CVD risk factors and MetS.

| Risk Factors   | Adjusted ORs (95% CI) for WC&WHtR |                    |                  |                     | Adjusted ORs (95% CI) for WHR&WHtR |                  |                   |                     |
|----------------|-----------------------------------|--------------------|------------------|---------------------|------------------------------------|------------------|-------------------|---------------------|
|                | WC0&WHtR0                         | WC1&WHtR0          | WC0&WHtR1        | WC1&WHtR1           | WHR0&WHtR0                         | WHR1&WHtR0       | WHR0&WHtR1        | WHR1&WHtR1          |
| <b>Males</b>   |                                   |                    |                  |                     |                                    |                  |                   |                     |
| Hypertension   | 1                                 | 2.00 (1.54,2.62)   | 1.99 (1.62,2.44) | 3.00 (2.70,3.33)    | 1                                  | 1.58 (1.33,1.88) | 2.14 (1.74,2.63)  | 3.16 (2.83,3.53)    |
| Dyslipidemia   | 1                                 | 3.27 (2.55,4.20)   | 2.50 (2.05,3.05) | 4.96 (4.47,5.50)    | 1                                  | 2.52 (2.14,2.98) | 2.96 (2.43,3.61)  | 5.67 (5.07,6.35)    |
| Diabetes       | 1                                 | 2.32 (1.52,3.52)   | 1.53 (1.10,2.13) | 3.01 (2.53,3.57)    | 1                                  | 1.77 (1.32,2.37) | 1.39 (0.94,2.05)  | 3.27 (2.70,3.96)    |
| MetS           | 1                                 | 12.35 (9.44,16.15) | 3.03 (2.3,3.91)  | 20.04 (17.38,23.10) | 1                                  | 3.92 (3.16,4.86) | 7.99 (6.36,10.03) | 19.47 (16.68,22.72) |
| <b>Females</b> |                                   |                    |                  |                     |                                    |                  |                   |                     |
| Hypertension   | 1                                 | 2.01 (1.40,2.88)   | 1.57 (1.29,1.89) | 3.23 (2.89,3.62)    | 1                                  | 1.24 (0.97,1.58) | 2.44 (2.07,2.88)  | 3.07 (2.72,3.46)    |
| Dyslipidemia   | 1                                 | 1.85 (1.32,2.59)   | 1.81 (1.52,2.16) | 3.17 (2.85,3.52)    | 1                                  | 1.53 (1.23,1.91) | 2.27 (1.94,2.64)  | 3.31 (2.96,3.71)    |
| Diabetes       | 1                                 | 1.15 (0.53,2.52)   | 2.02 (1.49,2.74) | 3.18 (2.61,3.89)    | 1                                  | 2.29 (1.55,3.38) | 2.03 (1.49,2.77)  | 4.01 (3.21,5.02)    |
| MetS           | 1                                 | 9.35 (6.67,13.11)  | 3.25 (2.59,4.08) | 16.42 (14.15,19.06) | 1                                  | 2.80 (2.12,3.70) | 8.07 (6.69,9.74)  | 15.35 (13.12,17.95) |

ORs were adjusted for age.

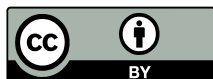

Supplement: ijerph-13-00801-s001.pdf [file ijerph-13-00801-s001.pdf]
